# Supplementary material for: Vaccination with recombinant Brugia malayi cystatin proteins alters worm migration, homing and final niche selection following a subcutaneous challenge of Mongolian gerbils (Meriones unguiculatus) with B. malayi infective larvae
Source: PubMed Central journal article supplement (PMC3910689; doi:10.1186/1756-3305-7-43), 2014-01-22
Supplement: 1756-3305-7-43-S1.pdf [file 1756-3305-7-43-S1.pdf]

```

Bm-CPI-1  1  ---REI RLSR-----ATYNE DDEI QEV AEA KAMEQVNDQTR YRNLYKLV
Bm-CPI-2  1  LIHRREI PHMESKGMQRGQVLLGGWQERSPEDNEI LEL LPSV LTKVNQQS NDEYHLMFI
          ***                *  *  *                *  *  *

Bm-CPI-1  42  RVISAQTQVVAGIKYYLTILAAPTTCRKGAVG-MNPMKCTIDSSKPTKQFKIEVWSAPWQ
Bm-CPI-2  61  KLLKVSSQVVAGVKYKMEVQVARS ECKKSA SEQVNLKTCCKLEGHPDQVMTLEVWEK PWE
          ***** **                *  *  *                *  *  *

                                     identity
Bm-CPI-1  101  NTFKVTLT-----                28%
Bm-CPI-2  121  DFLOVNI LETKVLSSV
          *

```

Suppl Fig. S1
