# Supplementary material for: Vaccination with recombinant Brugia malayi cystatin proteins alters worm migration, homing and final niche selection following a subcutaneous challenge of Mongolian gerbils (Meriones unguiculatus) with B. malayi infective larvae
Source: PubMed Central journal article supplement (PMC3910689; doi:10.1186/1756-3305-7-43), 2014-01-22
Supplement: 1756-3305-7-43-S2.pdf [file 1756-3305-7-43-S2.pdf]

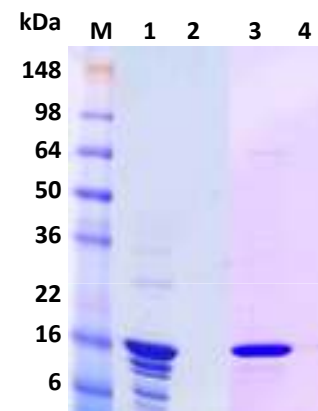

Suppl. Fig. S2
